# Supplementary material for: Pharmacokinetics and Safety of Amenamevir in Healthy Subjects: Analysis of Four Randomized Phase 1 Studies
Source: PubMed Central journal article supplement — Adv Ther. 2017 Nov 13;34(12):2625–37. doi: 10.1007/s12325-017-0642-4 (PMC5709458; doi:10.1007/s12325-017-0642-4), 2017-11-13

## Supplementary Materials

**Supplementary Table S1.** Design of the four phase 1 studies.

| <b>Study<br/>[Country]</b> | <b>Study design [n]</b>                                                    | <b>Assessments</b>                                         | <b>Comparators</b>                                                                | <b>Duration and<br/>condition</b>                                 |
|----------------------------|----------------------------------------------------------------------------|------------------------------------------------------------|-----------------------------------------------------------------------------------|-------------------------------------------------------------------|
| 15L-CL-001<br>[Japan]      | R, DB, dose-escalating study<br>in healthy male volunteers<br>[40]         | Safety, PK                                                 | Amenamevir capsule 5, 25, 100, 300, or 600 mg<br><br>Placebo                      | Single dose<br>administration in a<br>fasting condition           |
| 15L-CL-002<br>[France]     | Part 1: R, DB, dose-escalating<br>study in healthy male<br>volunteers [64] | Safety, PK                                                 | Amenamevir capsule 5, 25, 100, 300, 600, 1200,<br>1800, or 2400 mg<br><br>Placebo | Single dose<br>administration in a<br>fasting condition           |
|                            | Part 2: R, OL, CO study in<br>healthy male volunteers [8]                  | Safety, PK,<br>food effect                                 | Amenamevir capsule 300 mg                                                         | Single dose<br>administration in a<br>fasting or fed<br>condition |
| 15L-CL-003<br>[Japan]      | R, DB study in healthy non-<br>elderly and elderly male<br>subjects [36]   | Safety, PK                                                 | Amenamevir capsule 300 or 600 mg<br><br>Placebo                                   | Dose was<br>administered for 7<br>days in fed conditions          |
| 15L-CL-006<br>[USA]        | R, OL, CO study in healthy<br>male and female subjects<br>[24]             | Safety, PK,<br>relative<br>bioavailability,<br>food effect | Amenamevir capsule 800 mg<br><br>Amenamevir tablet 800 mg                         | Single dose<br>administration in a<br>fasting or fed<br>condition |

CO, crossover, DB, double blind, OL, open label, PK, pharmacokinetics; R, randomized

**Supplementary Figure S1.** Subject flow of study 15L-CL-001.

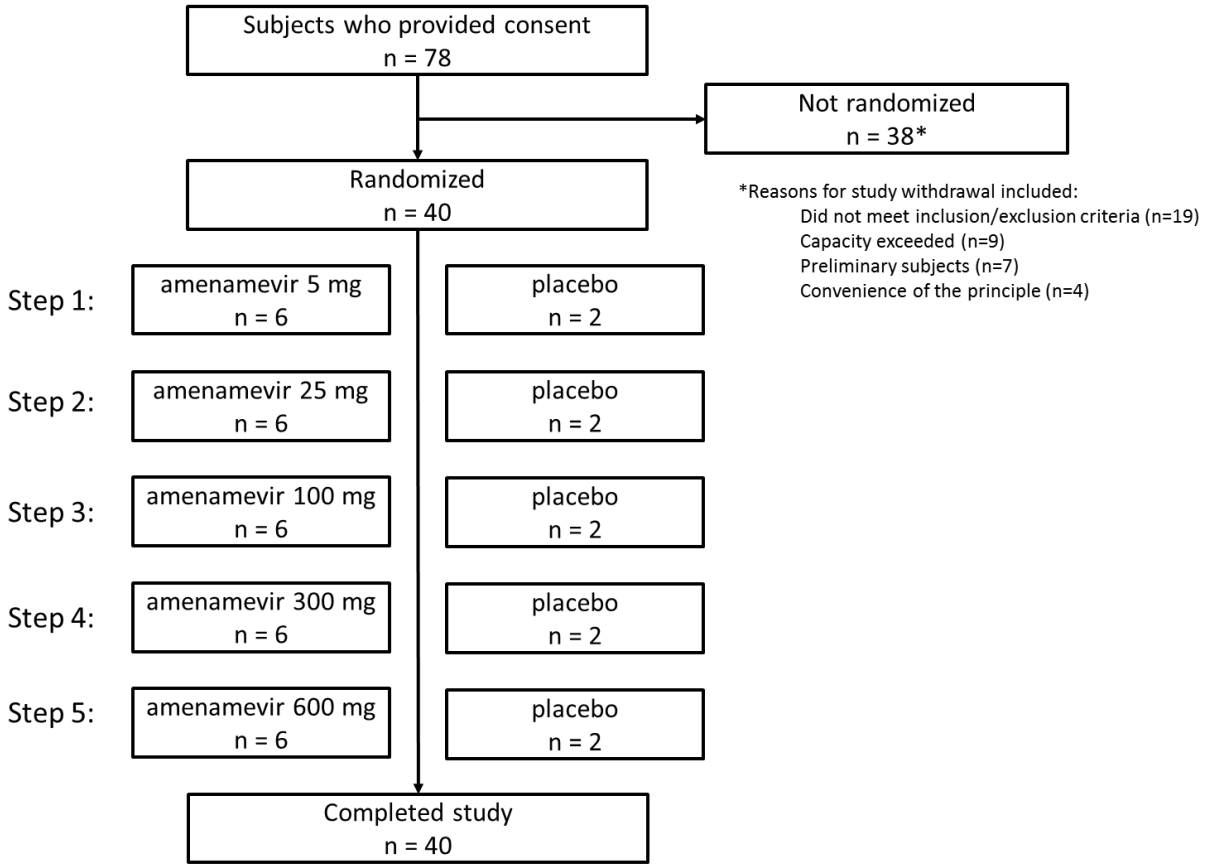

**Supplementary Figure S2.** Subject flow of study 15L-CL-002 (a) Part 1; (b) Part 2.

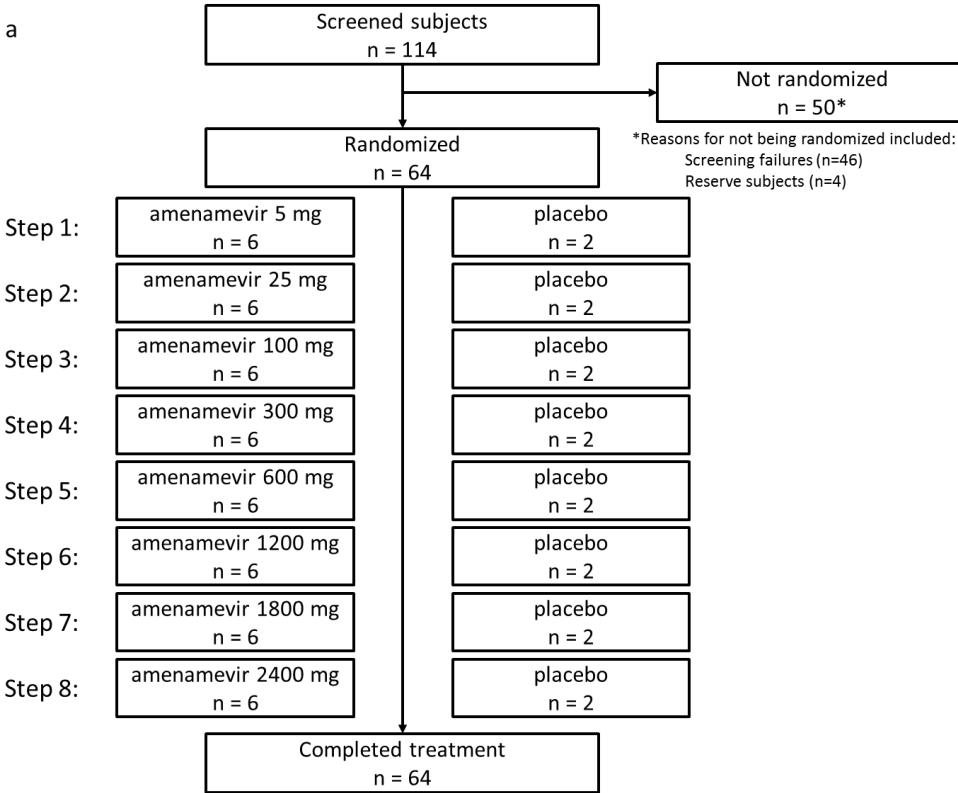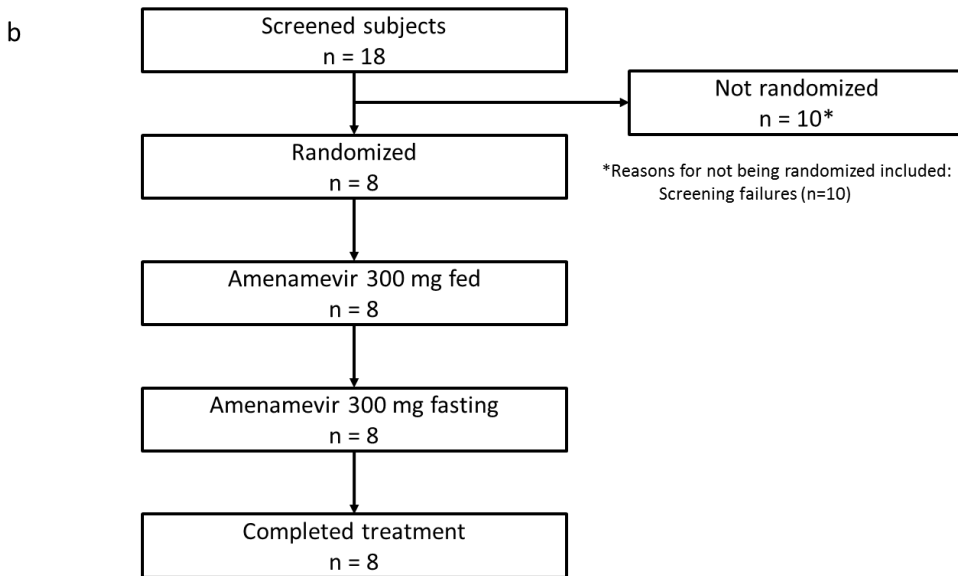

Supplementary Figure S3. Subject flow of study 15L-CL-003.

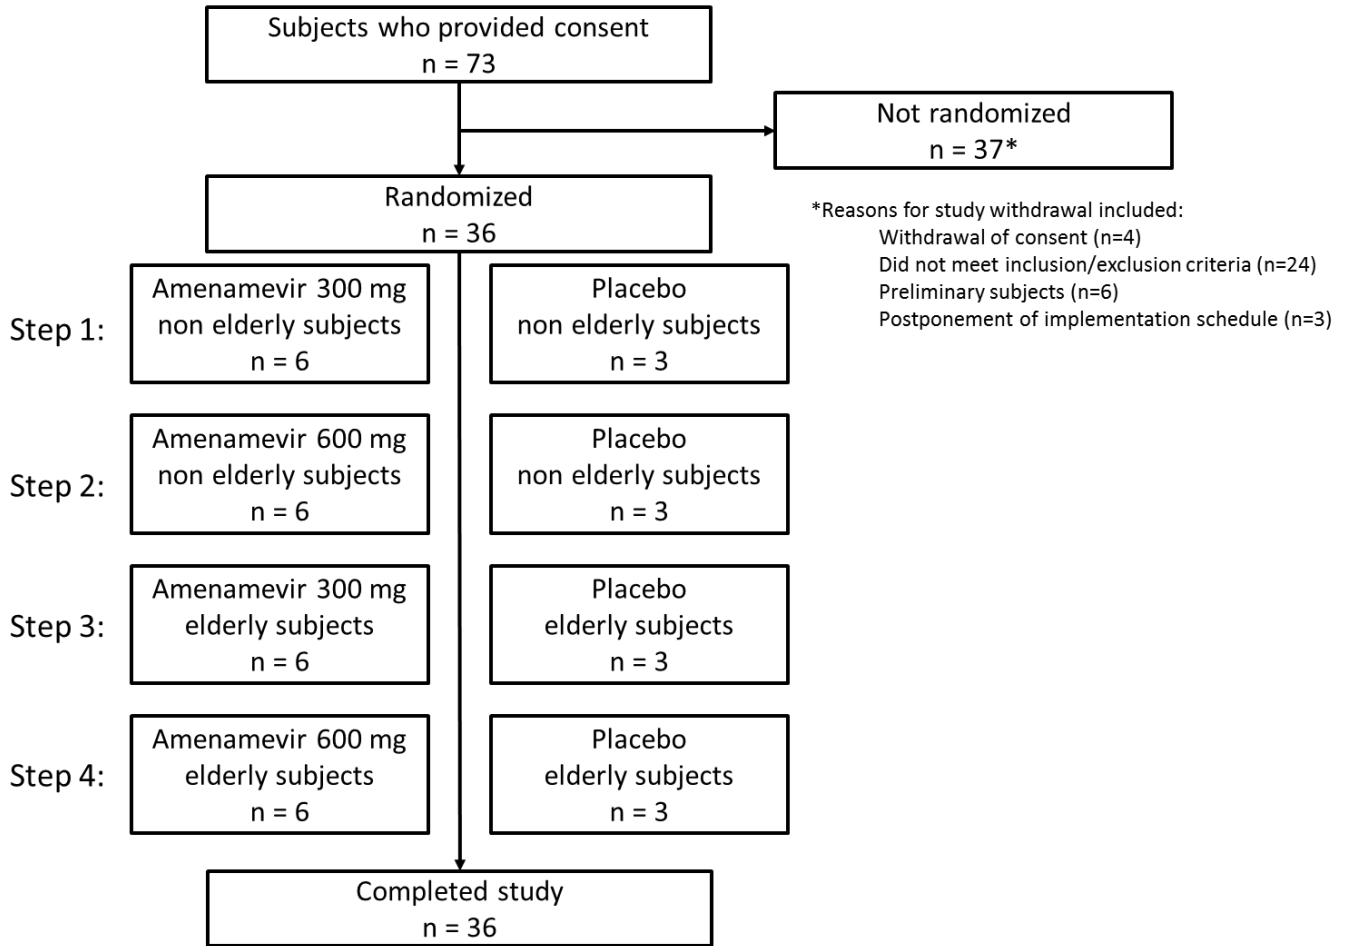

Supplementary Figure S4. Subject flow of study 15L-CL-006.

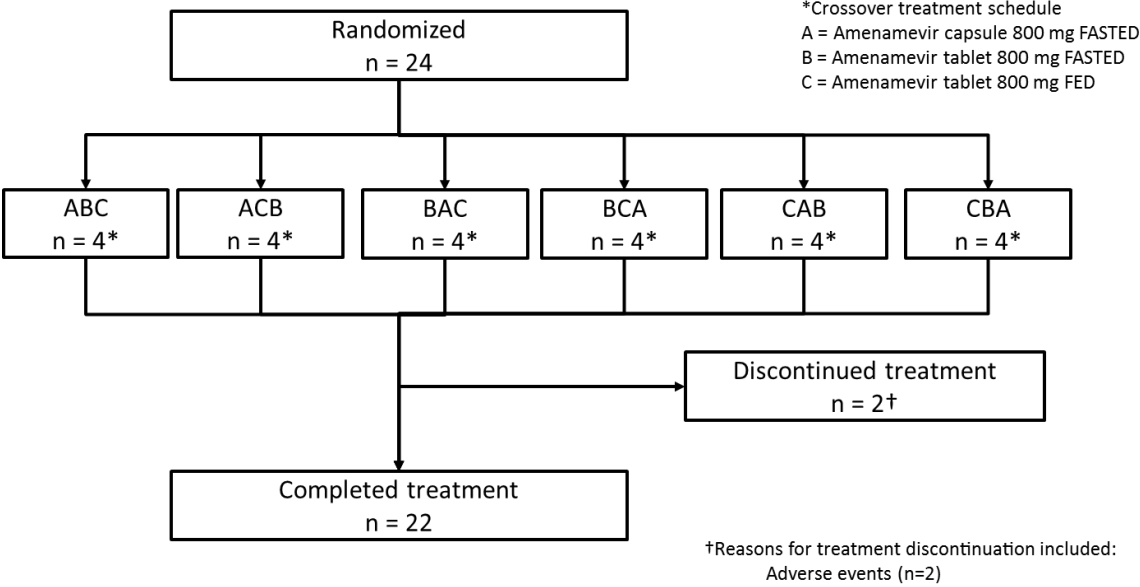

Supplement: 12325_2017_642_MOESM1_ESM.pdf [file 12325_2017_642_MOESM1_ESM.pdf]
